# Supplementary material for: The fluorite-like Ln5Mo3O16+δ family extension: LiLn4Mo3O15F (Ln = Eu, Gd, or Dy) ceramics
Source: Royal Society of Chemistry journal article supplement (doi:10.1039/d3nj03033d), 2023-01-01
Supplement: d3nj03033d1.pdf [file d3nj03033d1.pdf]

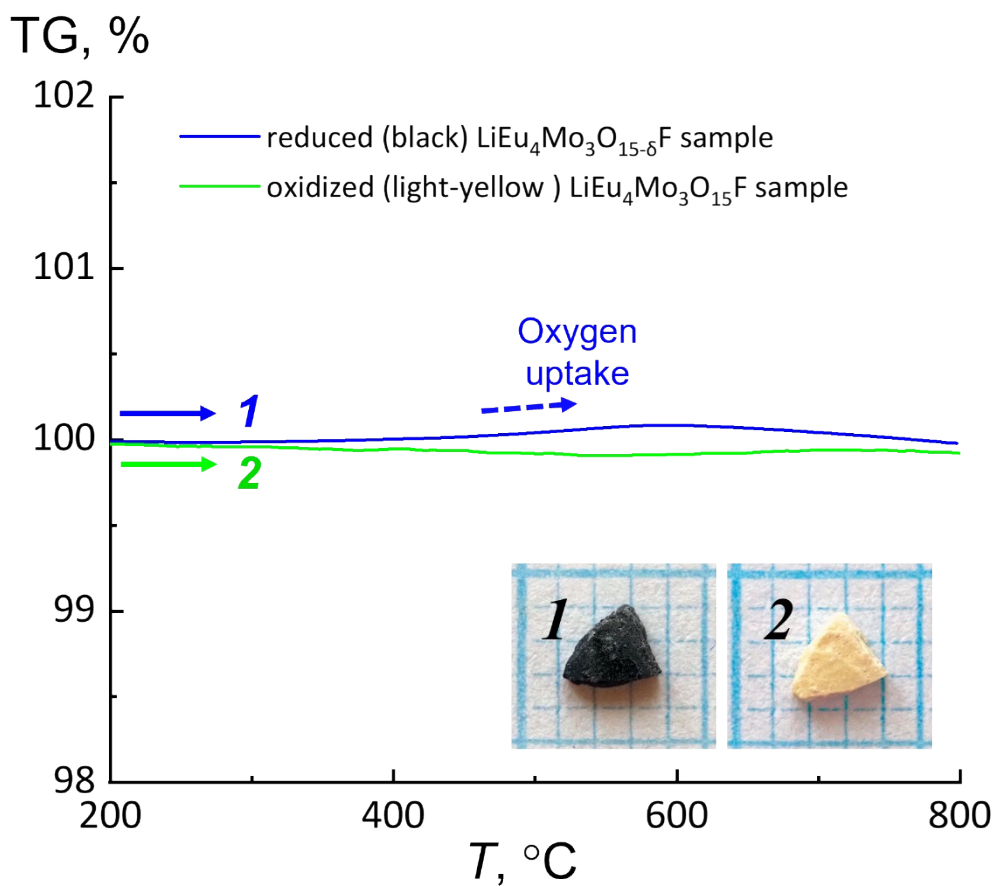

Figure S1. TG data for the reduced LiEu<sub>4</sub>Mo<sub>3</sub>O<sub>15-δ</sub>F and oxidized LiEu<sub>4</sub>Mo<sub>3</sub>O<sub>15</sub>F samples. The heating stages are indicated by solid arrows.
